# Supplementary material for: Information flows from hippocampus to auditory cortex during replay of verbal working memory items
Source: eLife journal article supplement (doi:10.7554/elife.78677), 2022-07-07
Supplement: figures [file elife-78677-figures-v1.pdf]

---

## Figures and figure supplements

Information flows from hippocampus to auditory cortex during replay of verbal working memory items

**Vasileios Dimakopoulos *et al***

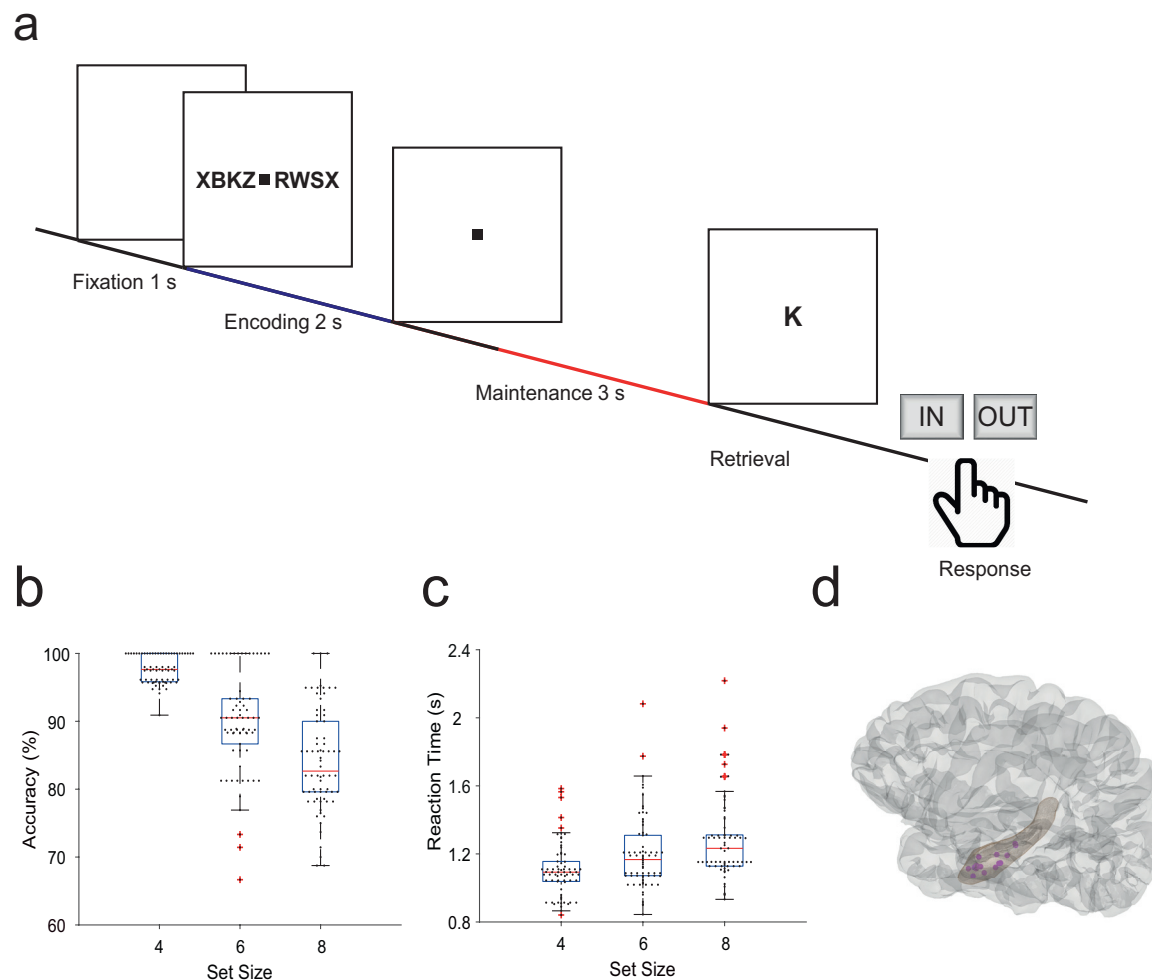

**Figure 1.** Task and recording sites. **(a)** In the task, sets of consonants are presented and have to be memorized. The set size (4, 6, or 8 letters) determines working memory workload. In each trial, presentation of a letter string (encoding period, 2 s) is followed by a delay (maintenance period, 3 s). After the delay, a probe letter is presented. Participants indicate whether the probe was in the letter string or not. **(b)** Response accuracy decreases with set size (71 sessions). **(c)** Reaction time increases with set size (53 ms/item). **(d)** The tip locations of the hippocampal local field potentials electrodes for all participants (N=15) are projected in a hippocampal surface.

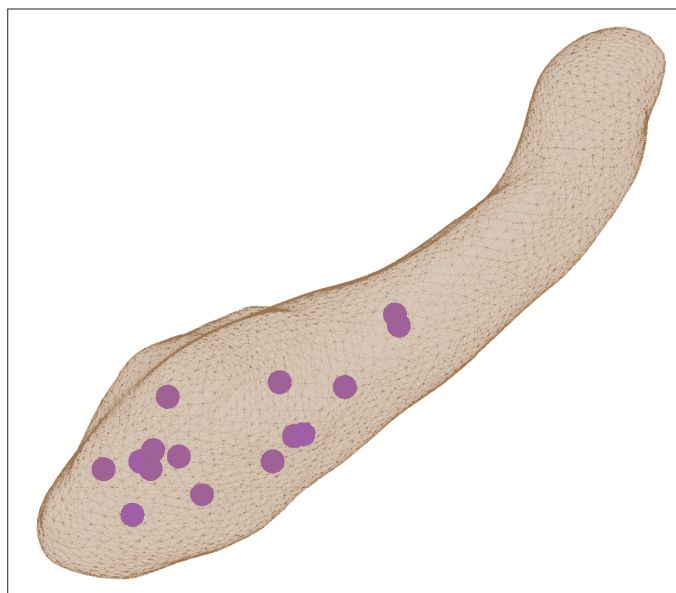

**Figure 1—figure supplement 1.** Hippocampal contact locations. The recording location of the hippocampal local field potentials electrode of each participant is projected in a left hippocampal surface.

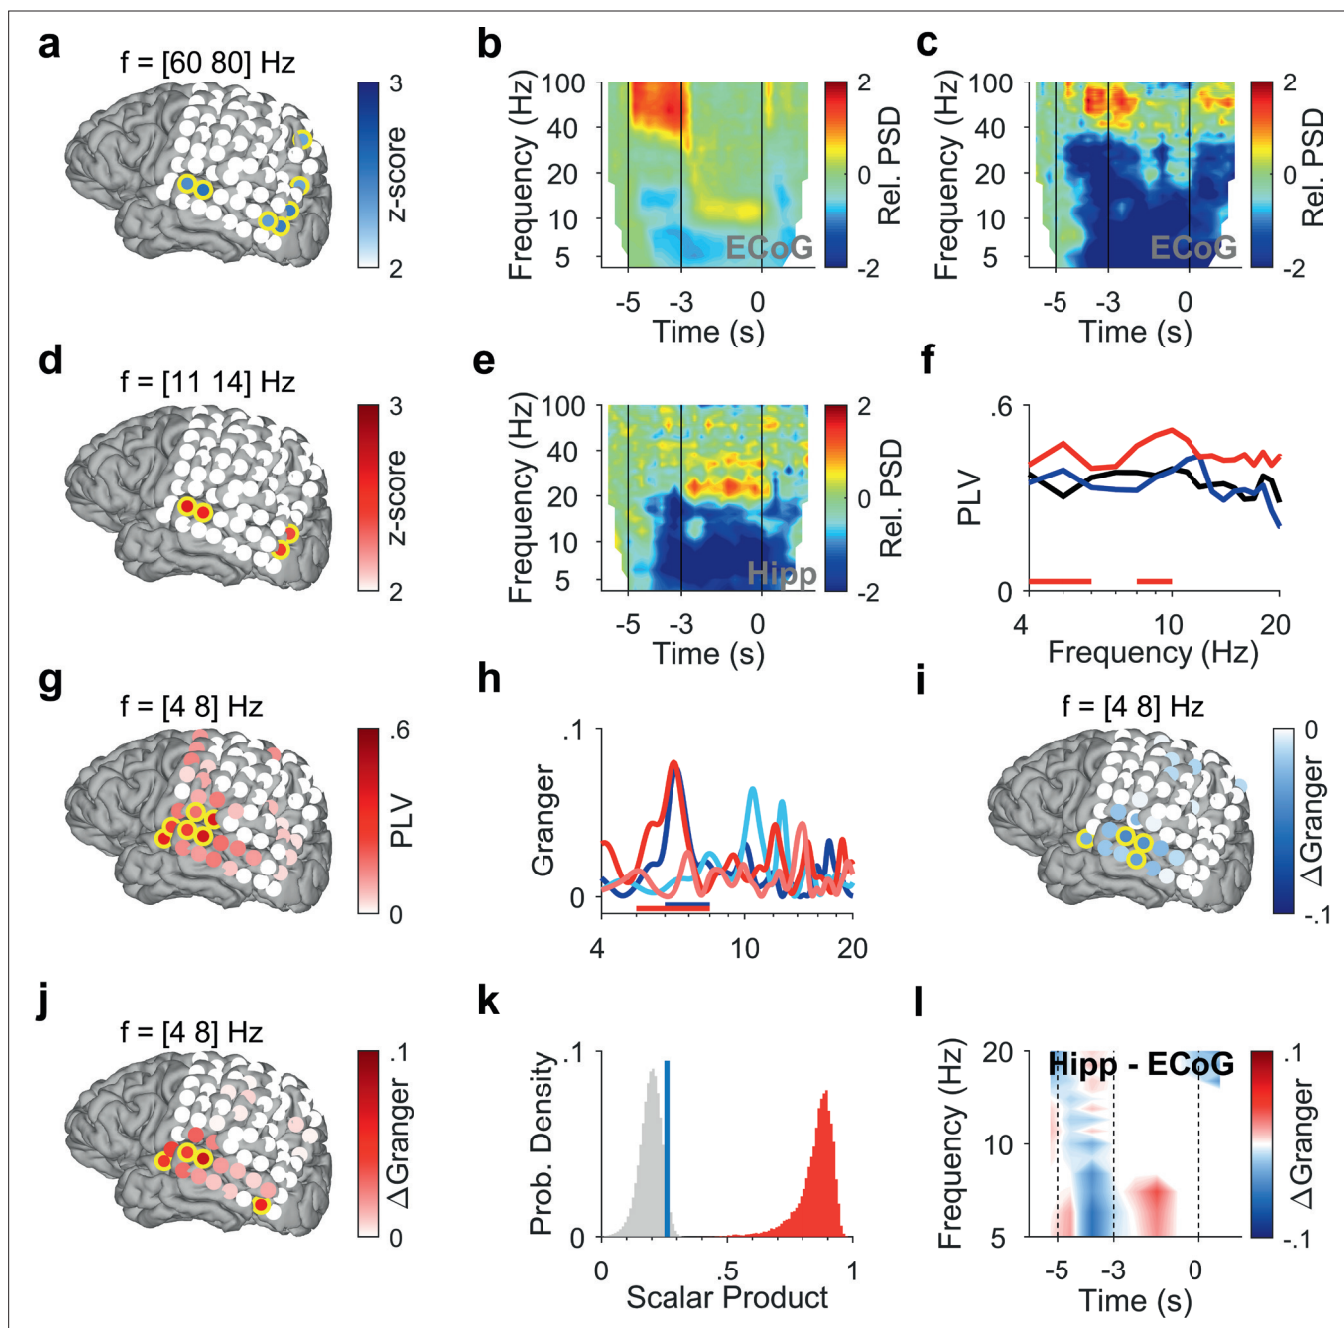

**Figure 2.** Encoding and replay of letters in Participant 1. (a) Location of the ECoG contacts over temporal and parietal cortex for Participant 1. Relative gamma power spectral density (PSD; [60 80] Hz) during encoding ([−3.5 −3] s) is maximal for contacts over temporal and occipital-parietal cortex. (b) The relative PSD in the occipital contact (contact H3) over visual cortex shows gamma activity (>40 Hz) during encoding ([−5 −3] s) while the subject sees and hears the letters. Sustained low beta activity ([11 14] Hz) appears toward the end of the maintenance period ([−3 0] s). (c) The relative PSD in the temporal contact (contact C2) over auditory cortex shows gamma activity ([60 80] Hz) during the last second of encoding ([−4 −3] s) while the subject sees and hears the letters. (d) Relative beta PSD ([11 14] Hz) during maintenance ([−2 0] s) is maximal for contacts over temporal and occipital cortex. (e) Hippocampal PSD shows sustained beta activity toward the end of maintenance. (f) Phase-locking value (PLV) between hippocampus and auditory cortex (contact C3) during fixation (black), encoding (blue), and maintenance (red). The PLV spectra show a broad frequency distribution. The PLV during maintenance is higher than during fixation. Red bars: frequency ranges of significant PLV difference ( $p < 0.05$ , cluster-based non-parametric permutation test against a null distribution with scrambled trials during fixation and maintenance). (g) PLV between hippocampus and cortex in theta ([4 8] Hz) during maintenance ([−2 0] s) is highest to contacts over auditory cortex. (h) Spectral Granger causality. During encoding ([−5 −3] s), auditory cortex (contact C2) predicts hippocampus ([6 8] Hz, dark blue curve exceeds light blue curve). During maintenance ([−2 0] s), hippocampus predicts auditory cortex ([5 8] Hz, dark red curve exceeds light red curve). Bars: frequency range of significant  $\Delta$ Granger ( $p < 0.05$ , cluster-based non-parametric permutation test against a null distribution with scrambled trials during encoding (blue) and maintenance (red)). (i) Net information flow  $\Delta$ Granger ([4

Figure 2 continued on next page

## Figure 2 continued

8] Hz) during encoding ([−5 −3] s). ECoG over auditory cortex predicts hippocampal local field potentials. **(j)** Net information flow  $\Delta\text{Granger}$  ([4 8] Hz) during maintenance ([−2 0] s). Hippocampus is maximal in predicting auditory cortex (contact C2 and surrounding contacts). **(k)** Statistical significance of the spatial spread of contacts with high  $\Delta\text{Granger}$  ([4 8] Hz) during maintenance ([−2 0] s). We calculated the scalar product between two spread vectors. We then tested the statistical significance of the scalar product. The true distribution (red) is clearly distinct from the null distribution (gray, blue bar marks 95th percentile). **(l)** The Granger time-frequency map illustrates the time course of the spectra of panel (h). During encoding, net information ( $\Delta\text{Granger}$ ) flows from auditory cortex to hippocampus (blue). During maintenance, the information flow is reversed from hippocampus to auditory cortex (red) indicating the replay of letters in memory. Grid contacts with significant increase are marked with a yellow rim ( $p < 0.05$ , cluster-based non-parametric permutation test against a null distribution with scrambled trials). The time course in time-frequency maps is shown relative to the fixation period **(b, c, e)**. Colors of Granger spectra indicate information flow: dark blue, cortex to hippocampus during encoding; light blue, hippocampus to cortex during encoding; dark red, hippocampus to cortex during maintenance; light red, cortex to hippocampus during maintenance.  $\Delta\text{Granger}$  is the difference between spectra, where  $\Delta\text{Granger} < 0$  denotes information flow cortex→hippocampus and  $\Delta\text{Granger} > 0$  denotes information flow hippocampus→cortex. Grid contacts are identified by column (anterior A to posterior H) and row (inferior 1 to superior 8).

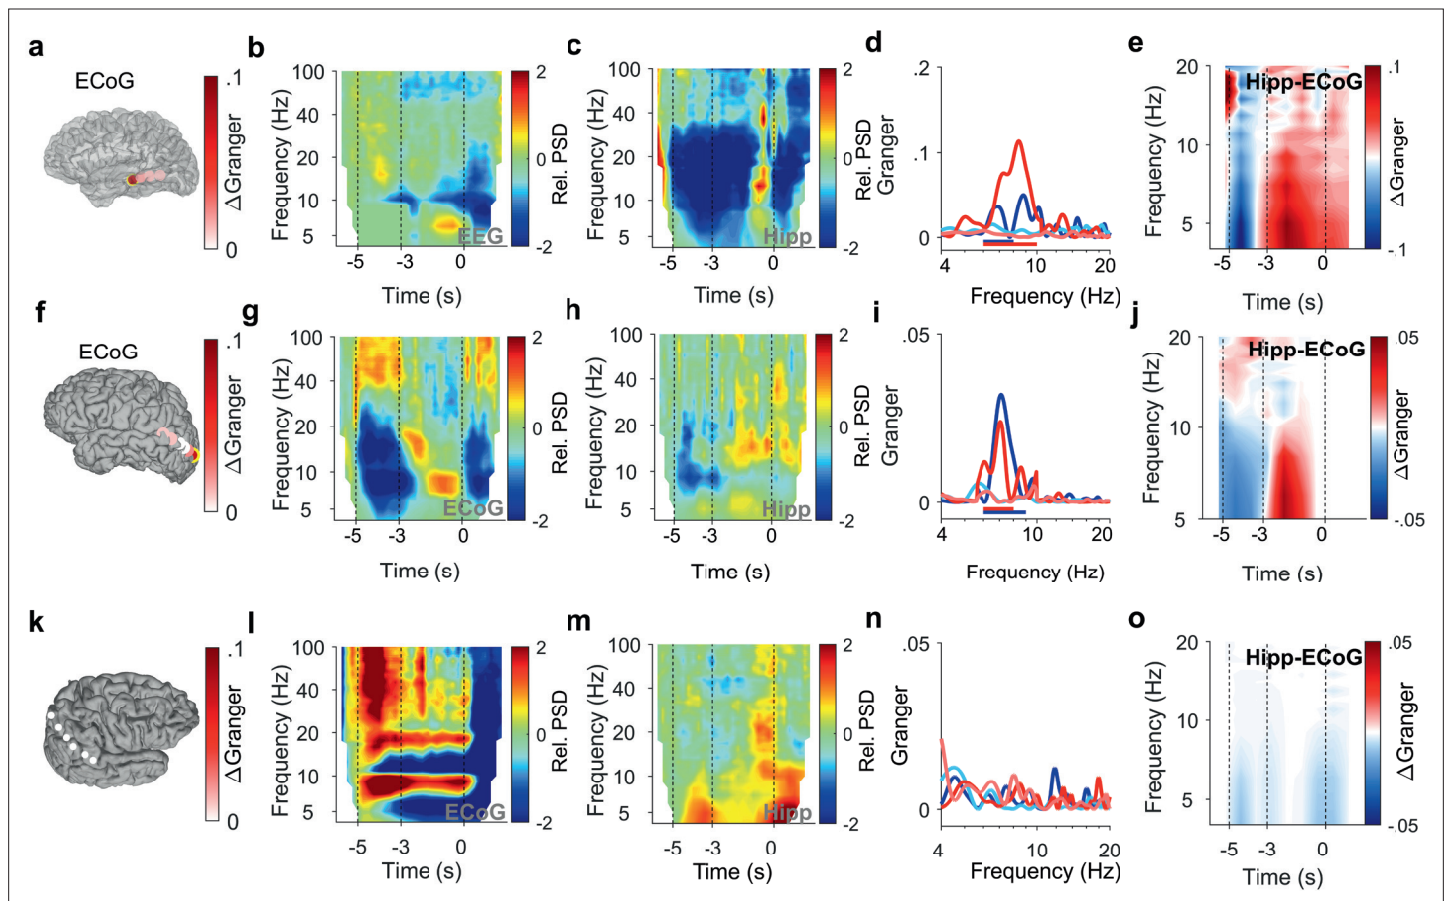

**Figure 3.** Encoding and replay of letters in three participants with ECoG. **(a)** Location of the ECoG contacts in Participant 2. The most anterior strip contact records from auditory cortex. Color bar:  $\Delta$ Granger during maintenance ([4 8] Hz). **(b)** The relative power spectral density (PSD) in the temporal scalp EEG electrode (T5) shows beta activity ([14 25] Hz) during encoding ([−5 −3] s) while the subject sees and hears the letters. Sustained theta activity ([6 9] Hz) appears toward the end of the maintenance period ([−3 0] s). **(c)** Hippocampal PSD shows alpha-beta activity (9–18 Hz) toward the end of maintenance. **(d)** Spectral Granger causality (GC). During encoding, the auditory cortex predicts hippocampus ([6 8] Hz, dark blue curve exceeds light blue curve). During maintenance, hippocampal local field potentials (LFP) predict auditory cortex ([6 10] Hz, dark red curve exceeds light red curve). **(e)** The time-frequency map illustrates the time course of  $\Delta$ Granger in Participant 2. **(f)** Location of the ECoG contacts in Participant 3. The most posterior contact records from visual cortex (yellow rimmed disk). Color bar:  $\Delta$ Granger during maintenance ([4 8] Hz). **(g)** The relative PSD in the most posterior contact (yellow rimmed disk, panel (f)) shows gamma during encoding while the subject sees the letters. Sustained alpha activity ([8 11] Hz) appears toward the end of the maintenance period. **(h)** Hippocampal PSD shows sustained beta activity ([13 21] Hz) toward the end of the maintenance. **(i)** Spectral GC. During encoding, the occipital ECoG predicts hippocampus (6–9 Hz, dark blue curve exceeds light blue curve). During maintenance, hippocampal LFP predicts ECoG ([6 8] Hz, dark red curve exceeds light red curve). **(j)** The time-frequency map illustrates the time course of  $\Delta$ Granger in Participant 3. **(k)** Location of the ECoG contacts in Participant 4 on right parietal cortex. Color bar:  $\Delta$ Granger during maintenance ([4 8] Hz). **(l)** The relative PSD in contact over the right parietal lobule shows gamma during encoding while the subject sees the letters. Sustained alpha activity ([8 11] Hz) appears during the maintenance period. **(m)** Hippocampal PSD shows sustained beta activity ([13 21] Hz) toward the end of the maintenance. **(n)** Spectral GC. Task performance does not elicit significant GC to the right parietal cortex in Participant 4. **(o)** The time-frequency map illustrates the time course of  $\Delta$ Granger in Participant 4. Task performance does not elicit significant GC to the right parietal cortex in Participant 4. Color bar:  $\Delta$ Granger during maintenance ([4 8] Hz). Grid contacts with significant increase in  $\Delta$ Granger are marked with a yellow rim (permutation test  $p < 0.05$ ). The time course in time-frequency maps is shown relative to the fixation period (**b, c, g, h, l, m**). Colors of Granger spectra indicate information flow: dark blue, cortex to hippocampus during encoding; light blue, hippocampus to cortex during encoding; dark red, hippocampus to cortex during maintenance; light red, cortex to hippocampus during maintenance.  $\Delta$ Granger is the difference between spectra where  $\Delta$ Granger  $< 0$  denotes information flow hippocampus  $\rightarrow$  cortex and  $\Delta$ Granger  $> 0$  denotes information flow hippocampus  $\leftarrow$  cortex. Bars: frequency range of significant  $\Delta$ Granger ( $p < 0.05$ ), cluster-based non-parametric permutation test against a null distribution with scrambled trials during encoding and maintenance, respectively.



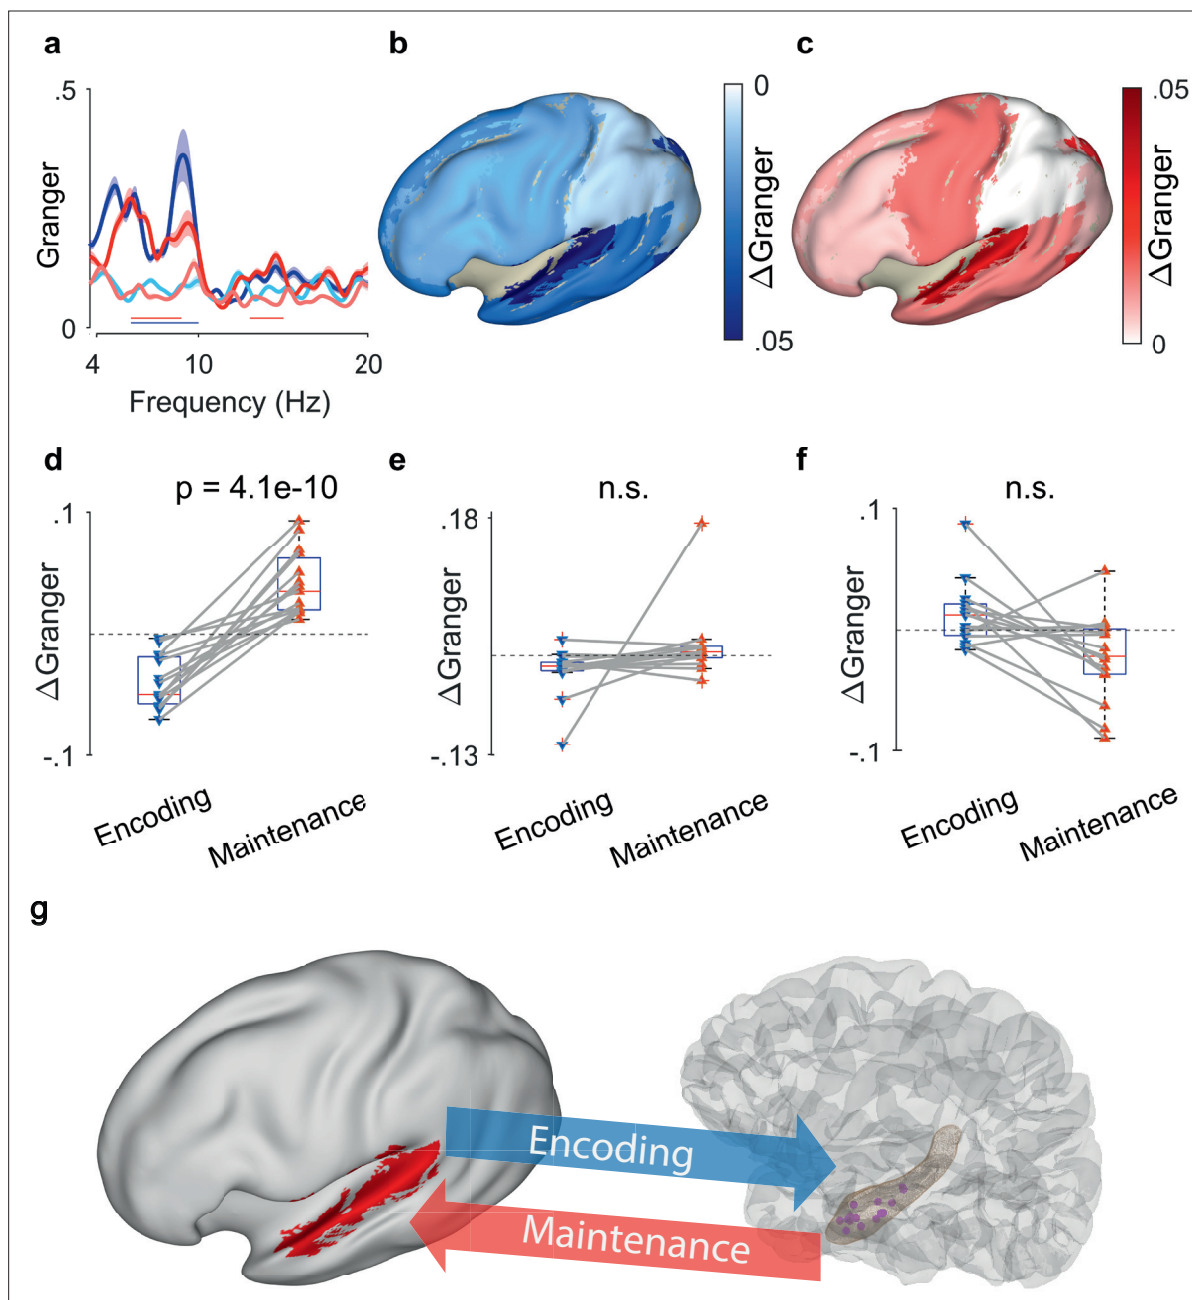

**Figure 4.** Granger causality (GC) between hippocampal local field potentials (LFP) and EEG sources. **(a)** Spectral GC between hippocampal LFP and auditory EEG sources, averaged over all  $N=15$  participants. The shaded area indicates the variability across the population. During encoding, the net Granger ( $\Delta$ Granger) indicates information flow from auditory cortex to hippocampus ([6 10] Hz, blue bar). During maintenance,  $\Delta$ Granger indicates information flow from hippocampal LFP to auditory cortex (red bars, [6 9] Hz, [13 15] Hz). Bars: frequency range of significant  $\Delta$ Granger ( $p < 0.05$ ), group cluster-based non-parametric permutation t-test against a null distribution with scrambled trials during encoding and maintenance. Colors of Granger spectra indicate information flow: dark blue, cortex to hippocampus during encoding; light blue, hippocampus to cortex during encoding; dark red, hippocampus to cortex during maintenance; light red, cortex to hippocampus during maintenance. **(b)** The median net information flow ( $\Delta$ Granger) in the [4 8] Hz range during encoding is projected onto an inflated brain surface. The maximal  $\Delta$ Granger appeared from temporal superior gyrus (median  $\Delta$ Granger =  $-0.049$ ) indicating information flow from auditory cortex to hippocampus. Negative values of median  $\Delta$ Granger appeared also in other areas, albeit less intense ( $\Delta$ Granger  $> -0.03$ ). **(c)** The median net information flow ( $\Delta$ Granger) in the [4 8] Hz range during maintenance is projected onto an inflated brain surface. The maximal  $\Delta$ Granger appeared from temporal superior gyrus (median  $\Delta$ Granger =  $0.034$ ) indicating an information flow from hippocampus to auditory cortex. Positive values of median  $\Delta$ Granger appeared also in other areas, albeit less intense ( $\Delta$ Granger  $< 0.02$ ). **(d)** The maximal  $\Delta$ Granger in the [4 8] Hz range was negative during encoding (blue, auditory cortex  $\rightarrow$  hippocampus, median  $\Delta$ Granger =  $-0.049$ ) and positive during maintenance (red, hippocampus  $\rightarrow$  auditory cortex, median  $\Delta$ Granger =  $0.034$ ) for each participant (red and blue connected marker, paired permutation

Figure 4 continued on next page

*Figure 4 continued*

test, correct trials only). The mean values and statistical significance derive only from 10% of the correct trials in order to balance the number of incorrect trials. **(e)** The net information flow between hippocampal LFP and lateral prefrontal cortex in the [4 8] Hz range has a lower median than to auditory cortex and higher variability (correct trials only,  $p=0.16$ , paired permutation test, not significant). **(f)** For incorrect trials, the maximal  $\Delta\text{Granger}$  in the [4 8] Hz range is highly variable ( $p=0.37$ , paired permutation test, not significant). **(g)** Bidirectional information flow between cortical sites and hippocampus in the working memory network. The GC analysis suggests a surprisingly simple model of information flow during the task. During encoding, letter strings are verbalized as subvocal speech; the incoming information flows from auditory cortex to hippocampus. During maintenance, participants actively recall and rehearse the subvocal speech in the phonological loop; GC indicates an information flow from hippocampus to cortex as the physiological basis for the replay of the memory items.



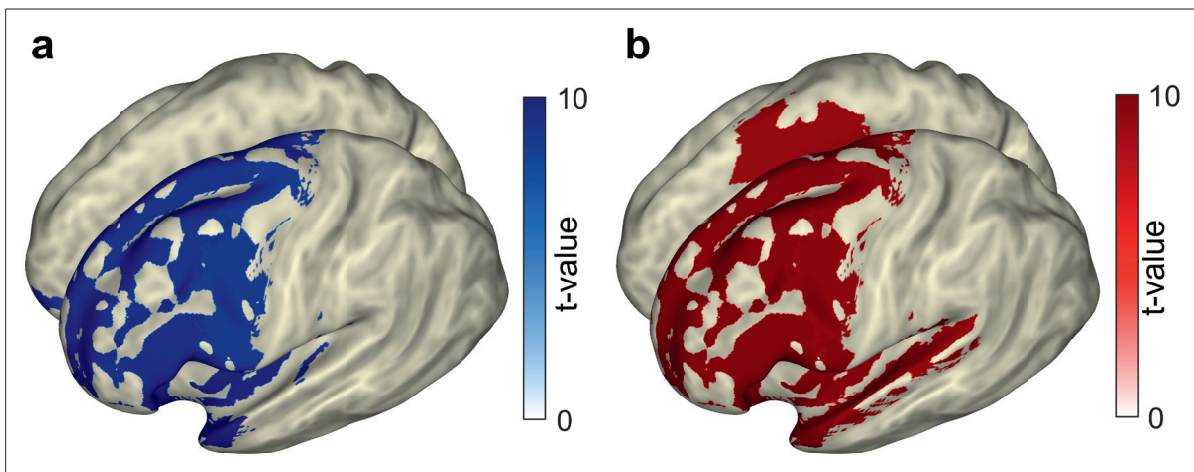

**Figure 4—figure supplement 1.** Spatial activation pattern of EEG beamforming sources. **(a)** The area of significant activation ( $t\text{-value} > 8$ ) during encoding compared to fixation is averaged for the group of participants and is projected onto an inflated brain surface. The most significant increase appears on sources over the left lateral prefrontal cortex. The spatial activation pattern at the cortical level spreads mostly over the left hemisphere (left frontal area, temporal pole, temporal superior gyrus, and Heschl gyrus). On the right hemisphere, there is only a small orbitofrontal activation. **(b)** The area of significant activation ( $t\text{-value} > 8$ ) during maintenance compared to fixation is projected onto an inflated brain surface. The most significant increase appears on sources over the left temporal superior gyrus (auditory cortex). The spatial activation pattern at the cortical level spreads mostly over the left hemisphere (left frontal area, temporal pole, temporal superior gyrus, and Heschl gyrus). On the right hemisphere, an activation appears on premotor/motor cortex. The spatial activation pattern derives from a non-parametric cluster-based permutation t-test ( $N=1000$  permutations, significance established at  $t > 1.96$  and  $p < 0.05$ ). The activation map is thresholded at the 80% of the maximal t-value. Blue colorbar: encoding, red colorbar: maintenance.
