# Supplementary material for: Information flows from hippocampus to auditory cortex during replay of verbal working memory items
Source: eLife. 2022 Aug 12;11:e78677. doi: 10.7554/eLife.78677 (PMC9374435; doi:10.7554/eLife.78677)
Supplement: Supplementary file 1. — For each participant, we list the coordinates of the tip of the hippocampal electrode for LFP recording. In addition, in Participants 1–4, grid or strip electrodes were placed for ECoG recording. LFP: local field potential; ECoG: electrocorticography. [file elife-78677-supp1.xlsx]

## Sheet: Table 1
Table 1
Participant	Pathology	Encoding						Maintenance
		Maximal LCMV source	Significant LCMV sources in the left hemisphere (%)	max. t-value	Heschl t-value	Heschl ΔGranger correct trials	Heschl ΔGranger incorrect trials	Maximal LCMV source	Significant LCMV sources in the left hemisphere (%)	max. t-value	Heschl t-value	Heschl ΔGranger correct trials	Heschl ΔGranger incorrect trials
1	hippocampal sclerosis	Heschl / Temporal Inferior L	100	17.8	17.8	-0.0364987	0.0872807	Frontal Mid Orb / Heschl L	100	10.1	10.1	0.0250932	-0.0367268
2	non-lesional	Heschl L	100	19.8	19.8	-0.0167161	0.0158241	Temporal Inferior L	96	11.4	10	0.0927864	0.00172521
3	focal cortical dysplasia	Temporal Superior L	91	24.2	16.3	-0.0603739	-0.0134955	Heschl L	91	14.6	14.6	0.065494	0.00549008
4	unclear etiology	Frontal Inferior L	100	18.3	16.6	-0.00596104	0.00288204	Heschl L	100	13.4	13.4	0.0346166	-0.00172467
5	brain contusion	Temporal Superior L	100	6.9	5.4	-0.00338335	-0.00214985	Heschl L	96	7.6	7.6	0.0208544	0.0477131
6	hippocampal sclerosis	Supramarginal L	98	11.1	9.7	-0.0494307	0.0252229	Temporal Pole Superior L	93	19.8	17.9	0.0387057	-0.0242053
7	xanthoastrozytoma	Lingual R	87	12.9	11.5	-0.0585173	0.0423189	Caudate L	85	9.3	8.2	0.0420821	-0.0356381
8	focal cortical dysplasia	Caudate L	100	18.8	16.2	-0.0399433	0.0130494	Parietal Superior L	100	9.9	8.3	0.0173351	-0.0306815
9	gliosis	Cingulum Anterior L	100	12.3	11.2	-0.0507545	0.0121792	Parietal Inferior L	100	12.6	11.2	0.0501056	-0.0149814
10	hippocampal sclerosis	Heschl L	100	7.9	7.9	-0.0697501	-0.0162913	Cingulum Mid L	100	2.7	2.3	0.0179878	-0.0810948
11	hippocampal sclerosis	Cingulum Anterior L	100	10.8	6.3	-0.0523258	-0.0110711	Cuneus L	86	4.8	4.3	0.0196968	-0.0623047
12	hippocampal sclerosis	Temporal Superior L	95	8.1	6.7	-0.0215642	0	Temporal Pole Mid L	100	7.3	4.9	0.0119635	0.00337449
13	hippocampal sclerosis	Temporal Superior R	93	10.8	6.9	-0.01778	0.018937	Parietal Superior R	81	5.6	4.9	0.0196385	-0.0217538
14	hippocampal sclerosis	Temporal Superior L	100	16.8	13.3	-0.0526571	0.0218579	Heschl L	100	11.8	11.8	0.0853329	-0.0888105
15	hippocampal sclerosis	Heschl L	98	9.1	9.1	-0.0612219	-0.00517982	Heschl L	100	10.4	10.4	0.0685297	-0.00368548

## Sheet: Table 1 220624 calculate
Table 1
Participant	Pathology	Encoding						Maintenance
		Maximal LCMV source	Significant LCMV sources in the left hemisphere (%)	max. t-value	Heschl t-value	Heschl ΔGranger correct trials	Heschl ΔGranger incorrect trials	Maximal LCMV source	Significant LCMV sources in the left hemisphere (%)	max. t-value	Heschl t-value	Heschl ΔGranger correct trials	Heschl ΔGranger incorrect trials
1	hippocampal sclerosis	Heschl / Temporal Inferior L	100	17.8	17.8	-0.0364987	0.0872807	Frontal Mid Orb / Heschl L	100	10.1	10.1	0.0250932	-0.0367268		-3.64987	8.72807	2.50932	-3.67268
2	non-lesional	Heschl L	100	19.8	19.8	-0.0167161	0.0158241	Temporal Inferior L	96	11.4	10	0.0927864	0.00172521		-1.67161	1.58241	9.27864	0.172521
3	focal cortical dysplasia	Temporal Superior L	91	24.2	16.3	-0.0603739	-0.0134955	Heschl L	91	14.6	14.6	0.065494	0.00549008		-6.03739	-1.34955	6.5494	0.549008
4	unclear etiology	Frontal Inferior L	100	18.3	16.6	-0.00596104	0.00288204	Heschl L	100	13.4	13.4	0.0346166	-0.00172467		-0.596104	0.288204	3.46166	-0.172467
5	brain contusion	Temporal Superior L	100	6.9	5.4	-0.00338335	-0.00214985	Heschl L	96	7.6	7.6	0.0208544	0.0477131		-0.338335	-0.214985	2.08544	4.77131
6	hippocampal sclerosis	Supramarginal L	98	11.1	9.7	-0.0494307	0.0252229	Temporal Pole Superior L	93	19.8	17.9	0.0387057	-0.0242053		-4.94307	2.52229	3.87057	-2.42053
7	xanthoastrozytoma	Lingual R	87	12.9	11.5	-0.0585173	0.0423189	Caudate L	85	9.3	8.2	0.0420821	-0.0356381		-5.85173	4.23189	4.20821	-3.56381
8	focal cortical dysplasia	Caudate L	100	18.8	16.2	-0.0399433	0.0130494	Parietal Superior L	100	9.9	8.3	0.0173351	-0.0306815		-3.99433	1.30494	1.73351	-3.06815
9	gliosis	Cingulum Anterior L	100	12.3	11.2	-0.0507545	0.0121792	Parietal Inferior L	100	12.6	11.2	0.0501056	-0.0149814		-5.07545	1.21792	5.01056	-1.49814
10	hippocampal sclerosis	Heschl L	100	7.9	7.9	-0.0697501	-0.0162913	Cingulum Mid L	100	2.7	2.3	0.0179878	-0.0810948		-6.97501	-1.62913	1.79878	-8.10948
11	hippocampal sclerosis	Cingulum Anterior L	100	10.8	6.3	-0.0523258	-0.0110711	Cuneus L	86	4.8	4.3	0.0196968	-0.0623047		-5.23258	-1.10711	1.96968	-6.23047
12	hippocampal sclerosis	Temporal Superior L	95	8.1	6.7	-0.0215642	0	Temporal Pole Mid L	100	7.3	4.9	0.0119635	0.00337449		-2.15642	0	1.19635	0.337449
13	hippocampal sclerosis	Temporal Superior R	93	10.8	6.9	-0.01778	0.018937	Parietal Superior R	81	5.6	4.9	0.0196385	-0.0217538		-1.778	1.8937	1.96385	-2.17538
14	hippocampal sclerosis	Temporal Superior L	100	16.8	13.3	-0.0526571	0.0218579	Heschl L	100	11.8	11.8	0.0853329	-0.0888105		-5.26571	2.18579	8.53329	-8.88105
15	hippocampal sclerosis	Heschl L	98	9.1	9.1	-0.0612219	-0.00517982	Heschl L	100	10.4	10.4	0.0685297	-0.00368548		-6.12219	-0.517982	6.85297	-0.368548

## Sheet: Table_1 obsolete
Table 1
Participant	Age	Pathology	Hippocampal recording site	Number of correct trials	Highest LCMV source	Highest LCMV source	t value	Heschl t-value	ΔGranger	ΔGranger	Highest LCMV source	Highest LCMV source	t value	Heschl t-value	ΔGranger	ΔGranger
					atlas parcel	hemisphere			correct	incorrect	atlas parcel	hemisphere			correct	incorrect
					encoding	encoding	encoding	encoding	encoding	encoding	maintenance	maintenance	maintenance	maintenance	maintenance	maintenance
1	46	hippocampal sclerosis	SOZ	77	Heschl / Temporal Inferior	L	17.8	17.8	-3.64987	8.72807	Frontal Mid Orb / Heschl	L	10.1	10.1	2.50932	-3.67268
2	19	non-lesional	non-SOZ	259	Heschl	L	19.8	19.8	-1.67161	1.58241	Temporal Inferior	L	11.4	10	9.27864	0.172521
3	20	FCD Typ III NOS	non-SOZ	269	Temporal Superior	L	24.2	16.3	-6.03739	-1.34955	Heschl	L	14.6	14.6	6.5494	0.549008
4	28	brain contusion	non-SOZ	94	Temporal Superior	L	6.9	5.4	-0.338335	-0.214985	Heschl	L	7.6	7.6	2.08544	4.77131
5	31	hippocampal sclerosis	non-SOZ	329	Supramarginal	L	11.1	9.7	-4.94307	2.52229	Temporal Pole Superior	L	19.8	17.9	3.87057	-2.42053
6	24	xanthoastrozytoma WHO II	non-SOZ	185	Lingual	R	12.9	11.5	-5.85173	4.23189	Caudate	L	9.3	8.2	4.20821	-3.56381
7	20	focal cortical dysplasia	non-SOZ	137	Caudate	L	18.8	16.2	-3.99433	1.30494	Parietal Superior	L	9.9	8.3	1.73351	-3.06815
8	39	gliosis	non-SOZ	293	Cingulum Anterior	L	12.3	11.2	-5.07545	1.21792	Parietal Inferior	L	12.6	11.2	5.01056	-1.49814
9	19	hippocampal sclerosis	non-SOZ	90	Heschl	L	7.9	7.9	-6.97501	-1.62913	Cingulum Mid	L	2.7	2.3	1.79878	-8.10948
10	47	hippocampal sclerosis	non-SOZ	187	Cingulum Anterior	L	10.8	6.3	-5.23258	-1.10711	Cuneus	L	4.8	4.3	1.96968	-6.23047
11	18	hippocampal sclerosis	non-SOZ	137	Temporal Superior	L	8.1	6.7	-2.15642	0	Temporal Pole Mid	L	7.3	4.9	1.19635	0.337449
12	56	hippocampal sclerosis	non-SOZ	224	Temporal Superior	R	10.8	6.9	-1.778	1.8937	Parietal Superior	R	5.6	4.9	1.96385	-2.17538
13	51	hippocampal sclerosis	SOZ	349	Temporal Superior	L	16.8	13.3	-5.26571	2.18579	Heschl	L	11.8	11.8	8.53329	-8.88105
14	29	unclear etiology	SOZ	293	Frontal Inferior	L	18.3	16.6	-0.596104	0.288204	Heschl	L	13.4	13.4	3.46166	-0.172467
15	30	hippocampal sclerosis	SOZ	179	Heschl	L	9.1	9.1	-6.12219	-0.517982	Heschl	L	10.4	10.4	6.85297	-0.368548
median	29			187			12.3	11.2	-4.94307	1.21792			10.1	10	3.46166	-2.17538

## Sheet: Table 1 obsolete
Table 1
Participant	Pathology	Encoding						Maintenance
		Maximal LCMV source	Significant LCMV sources in the left hemisphere (%)	max. t-value	Heschl t-value	Heschl ΔGranger correct trials	Heschl ΔGranger incorrect trials	Maximal LCMV source	Significant LCMV sources in the left hemisphere (%)	max. t-value	Heschl t-value	Heschl ΔGranger correct trials	Heschl ΔGranger incorrect trials
1	hippocampal sclerosis	Heschl / Temporal Inferior L	100	17.8	17.8	-3.64987	8.72807	Frontal Mid Orb / Heschl L	100	10.1	10.1	2.50932	-3.67268
2	non-lesional	Heschl L	100	19.8	19.8	-1.67161	1.58241	Temporal Inferior L	96	11.4	10	9.27864	0.172521
3	focal cortical dysplasia	Temporal Superior L	91	24.2	16.3	-6.03739	-1.34955	Heschl L	91	14.6	14.6	6.5494	0.549008
4	unclear etiology	Frontal Inferior L	100	18.3	16.6	-0.596104	0.288204	Heschl L	100	13.4	13.4	3.46166	-0.172467
5	brain contusion	Temporal Superior L	100	6.9	5.4	-0.338335	-0.214985	Heschl L	96	7.6	7.6	2.08544	4.77131
6	hippocampal sclerosis	Supramarginal L	98	11.1	9.7	-4.94307	2.52229	Temporal Pole Superior L	93	19.8	17.9	3.87057	-2.42053
7	xanthoastrozytoma	Lingual R	87	12.9	11.5	-5.85173	4.23189	Caudate L	85	9.3	8.2	4.20821	-3.56381
8	focal cortical dysplasia	Caudate L	100	18.8	16.2	-3.99433	1.30494	Parietal Superior L	100	9.9	8.3	1.73351	-3.06815
9	gliosis	Cingulum Anterior L	100	12.3	11.2	-5.07545	1.21792	Parietal Inferior L	100	12.6	11.2	5.01056	-1.49814
10	hippocampal sclerosis	Heschl L	100	7.9	7.9	-6.97501	-1.62913	Cingulum Mid L	100	2.7	2.3	1.79878	-8.10948
11	hippocampal sclerosis	Cingulum Anterior L	100	10.8	6.3	-5.23258	-1.10711	Cuneus L	86	4.8	4.3	1.96968	-6.23047
12	hippocampal sclerosis	Temporal Superior L	95	8.1	6.7	-2.15642	0	Temporal Pole Mid L	100	7.3	4.9	1.19635	0.337449
13	hippocampal sclerosis	Temporal Superior R	93	10.8	6.9	-1.778	1.8937	Parietal Superior R	81	5.6	4.9	1.96385	-2.17538
14	hippocampal sclerosis	Temporal Superior L	100	16.8	13.3	-5.26571	2.18579	Heschl L	100	11.8	11.8	8.53329	-8.88105
15	hippocampal sclerosis	Heschl L	98	9.1	9.1	-6.12219	-0.517982	Heschl L	100	10.4	10.4	6.85297	-0.368548
